# Supplementary material for: Correlating gene and protein expression data using Correlated Factor Analysis
Source: PubMed Central journal article supplement (PMC2744708; doi:10.1186/1471-2105-10-272), 2009-09-01
Supplement: 1471-2105-10-272-S1.pdf [file 1471-2105-10-272-S1.pdf]

# Additional file 1: Correlating gene and protein expression data using Correlated Factor Analysis

By Chuen Seng Tan, *et al.*

## 1 Proof of identifiability for Correlated Factor Analysis (CFA)

This section gives the proof that the Correlated Factor Analysis (CFA) model is unique when we assume orthogonality:  $\mathbf{A}'\mathbf{A} = I_r$  and  $\mathbf{B}'\mathbf{B} = I_r$ , and  $\text{cov}(\mathbf{g}, \mathbf{h}) \equiv \mathbf{\Lambda}_{r \times r}$  is diagonal with decreasing values.

**Theorem 1** *Given the  $r$ -factor Correlated Factor Analysis (CFA) model*

$$\mathbf{z}_{j(p+q) \times 1} = \mathbf{L}_{(p+q) \times 2r} \mathbf{f}_{j2r \times 1} + \boldsymbol{\epsilon}_{j(p+q) \times 1}$$

where  $\mathbf{z}_j \equiv (\mathbf{x}'_j, \mathbf{y}'_j)'$ ,  $\mathbf{f}_j \sim N_{2r}(0, \mathbf{\Psi}_{2r \times 2r})$ ,  $\boldsymbol{\epsilon}_j \sim N_{(p+q)}(0, \mathbf{\Phi}_{(p+q) \times (p+q)})$  and  $\mathbf{L}'\mathbf{L} = I_{2r}$  and  $\mathbf{\Psi}$  can be partitioned as

$$\mathbf{\Psi}_{2r \times 2r} = \left( \begin{array}{c|c} \mathbf{\Psi}_{x_r \times r} & \mathbf{\Lambda}_{r \times r} \\ \hline \mathbf{\Lambda}_{r \times r} & \mathbf{\Psi}_{y_r \times r} \end{array} \right),$$

where  $\mathbf{\Lambda}$  is diagonal and its main diagonal elements are ordered such that  $\mathbf{\Lambda} = \text{diag}\{\lambda_1, \lambda_2, \dots, \lambda_r\}$  with  $\lambda_1 > \lambda_2, \dots, > \lambda_r > 0$ .

If the loading matrix ( $\mathbf{L}$ ), factor variables ( $\mathbf{f}_j$ s) and errors variables ( $\boldsymbol{\epsilon}_j$ s) are given by:

$$\mathbf{L} = \left( \begin{array}{c|c} \mathbf{A} & \mathbf{0} \\ \hline \mathbf{0} & \mathbf{B} \end{array} \right),$$

$$\mathbf{f}_j = \left( \begin{array}{c} \mathbf{g}_j \\ \mathbf{h}_j \end{array} \right), \text{ and}$$

$$\boldsymbol{\epsilon}_j = \left( \begin{array}{c} \boldsymbol{\epsilon}_j^x \\ \boldsymbol{\epsilon}_j^y \end{array} \right),$$

then the parameters are unique.

**Proof:** Suppose the estimates are not unique. In other words, there exists a non-singular matrix  $\mathbf{C}$  so that a new loading matrix  $\mathbf{L}^* = \mathbf{L}\mathbf{C}$  and new factor covariance matrix  $\mathbf{\Psi}^* = \mathbf{C}^{-1}\mathbf{\Psi}\mathbf{C}'^{-1}$  satisfy the constraints of the model,  $\mathbf{L}^*\mathbf{L}^* = I_{2r}$ .

Suppose we partitioned matrix  $\mathbf{C}$  into

$$\mathbf{C}_{2r \times 2r} = \left( \begin{array}{c|c} \mathbf{C}_{11r \times r} & \mathbf{C}_{12r \times r} \\ \hline \mathbf{C}_{21r \times r} & \mathbf{C}_{22r \times r} \end{array} \right).$$

The new loading matrix  $\mathbf{L}^*$  is given by

$$\mathbf{L}^* = \left( \begin{array}{c|c} \mathbf{A}\mathbf{C}_{11} & \mathbf{A}\mathbf{C}_{12} \\ \hline \mathbf{B}\mathbf{C}_{21} & \mathbf{B}\mathbf{C}_{22} \end{array} \right).$$

In order for  $\mathbf{L}^*$  to have the same structure as  $\mathbf{L}$  then  $\mathbf{A}\mathbf{C}_{12}$  and  $\mathbf{B}\mathbf{C}_{21}$  must be zero. But since columns of  $\mathbf{A}$  and  $\mathbf{B}$  are mutually orthogonal this is only possible if  $\mathbf{C}_{12} = \mathbf{C}_{21} = 0$ . The orthogonality constraints also have to be preserved, this means  $\mathbf{C}'_{11}\mathbf{A}'\mathbf{A}\mathbf{C}_{11} = \mathbf{C}'_{22}\mathbf{B}'\mathbf{B}\mathbf{C}_{22} = I_r$ . But since  $\mathbf{A}'\mathbf{A} = \mathbf{B}'\mathbf{B} = I_r$ , matrices  $\mathbf{C}_{11}$  and  $\mathbf{C}_{22}$  which satisfy the orthogonality constraint must be orthogonal.

The new factor covariance matrix  $\Psi^*$  can be written as

$$\mathbf{C}^{-1}\Psi\mathbf{C}'^{-1} = \left( \begin{array}{c|c} \mathbf{C}_{11}^{-1}\Psi_x\mathbf{C}'_{11} & \mathbf{C}_{11}^{-1}\Lambda\mathbf{C}'_{22} \\ \hline \mathbf{C}_{22}^{-1}\Lambda\mathbf{C}'_{11} & \mathbf{C}_{22}^{-1}\Psi_y\mathbf{C}'_{22} \end{array} \right).$$

$\mathbf{C}_{11}^{-1}\Lambda\mathbf{C}'_{22}$  and  $\mathbf{C}_{22}^{-1}\Lambda\mathbf{C}'_{11}$  are diagonal matrices, denoted as  $\Lambda^*$ . Since  $\Lambda = \mathbf{C}_{11}\Lambda^*\mathbf{C}'_{22}$ ,  $\mathbf{C}_{11}\Lambda^*\mathbf{C}'_{22}$  is the SVD representation of  $\Lambda$ , where  $\Lambda = \text{diag}\{\lambda_1, \lambda_2, \dots, \lambda_r\}$  with  $\lambda_1 > \lambda_2 > \dots > \lambda_r > 0$ . Therefore  $\mathbf{C}_{11}$  and  $\mathbf{C}_{22}$  are identity matrices, and  $\Lambda^* = \Lambda$ . Hence the solution is unique.

## 2 NCI microarray data

59 of the 60 human cancer cell lines Affymetrix HG-U133A chip from National Cancer Institute (NCI) were used in this paper. The gene expression values used here had been normalized by the GCRMA method. We further filtered out genes with low variation in this analysis. Figure 1 shows the qq-plot of the gene expression values of the 59 samples after filtering, where Figure 1 (a) is for all samples, while (b)-(d) are for three samples respectively. The boxplot of the gene expression values for each sample is in Figure 2.

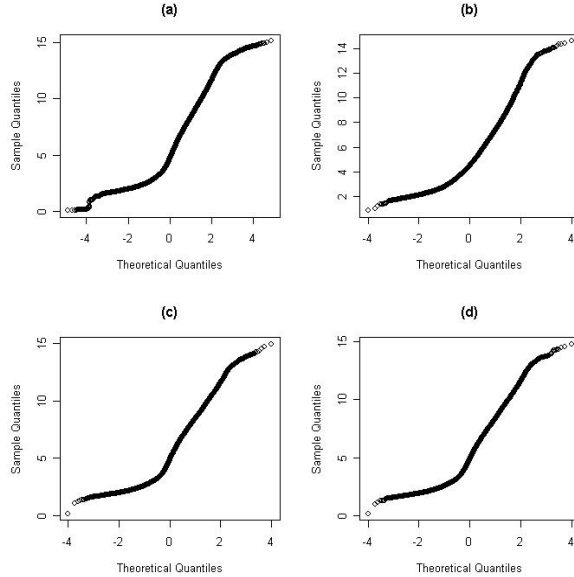

Figure 1: The qq-plot of the gene expressions from: (a) all 59 samples, and (b)-(d) three samples respectively.

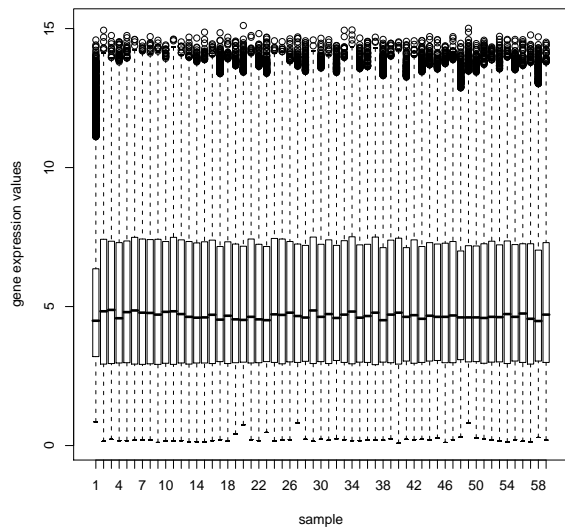

Figure 2: The boxplots of the gene expressions from the 59 samples.

### 3 NCI protein data

59 of the 60 human cancer cell lines reverse-phase protein lysate arrays (RPLA) from National Cancer Institute (NCI) were used in this paper. The protein expression values used here had been condensed into 89 proteins expression values and normalized. For the proteomic dataset, no filtering was performed. The qq-plot of the protein expression values from the 59 samples are in Figure 3, where (a) is for all samples, while (b)-(d) are for three samples respectively, and the boxplot of the protein expression values for each sample are in Figure 4.

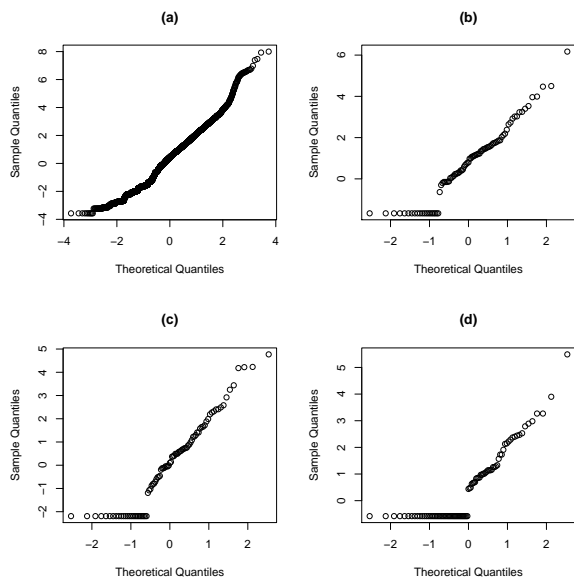

Figure 3: The qq-plot of the protein expressions from: (a) all 59 samples, and (b)-(d) three samples respectively.

## 4 Simulated data results of CFA

In this section, the simulation was based on 59 samples. Figure 5 (a) and (b) are the gene and protein patterns of the first pattern-pair respectively, while Figure 5 (c) and (d) are the gene and protein patterns of the second pattern-pair respectively. The solid line is the line-of-identity, the broken line is the interpolated 5-th and 95-th percentile of the patterns from 250 simulations, while the circles are their interpolated mean patterns. The patterns from CFA via SVD were slightly away from the line-of-identity, indicating a slight bias.

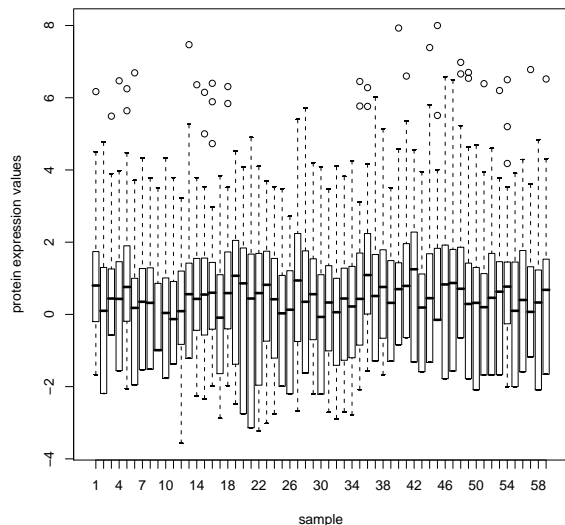

Figure 4: The boxplots of the protein expressions from the 59 samples.

## 5 Simulated data results of gSVD

To investigate whether the estimated patterns from gSVD can identify the true patterns in the simulation with 59 samples, we plotted the estimated patterns from gSVD having the highest absolute correlation with the true patterns; see Figure 6. Figure 6 (a) and (b) are the gene and protein patterns of the first pattern-pair respectively, while Figure 6 (c) and (d) are the gene and protein patterns of the second pattern-pair respectively. The patterns from gSVD were biased.

We also investigated if the angular distance improved the strength of the correlation between the estimated patterns from gSVD and the true patterns when  $n = 59$ , because the bias was less than  $n = 500$ . Since the range of the angular distances was  $-0.129$  and  $0.746$ , we considered angular distances near  $\pi/4$  and  $0$ . Among the two pattern-pairs with angular distance nearest to  $\pi/4$  and  $0$  respectively, the one having the highest absolute correlation with the true patterns was used. Figure 7 are the boxplots of the: (i) estimated patterns from gSVD having the largest absolute correlation with the true patterns,  $\text{Cor}(\text{max})$ , (ii) estimated patterns from gSVD having the highest absolute correlation with the true patterns among the two pattern-pairs with angular distances nearest to  $\pi/4$ ,  $\text{AD}(\text{max})$ , and (iii) estimated patterns from gSVD having the highest absolute correlation with the true patterns among the two pattern-pairs with angular distances nearest to  $0$ ,  $\text{AD}(0)$ . Figure 7 (a)-(b) are the boxplots for the gene and protein patterns of the first pattern-pair respectively, while Figure 7 (c)-(d) are the boxplots for the gene and protein patterns of the second pattern-pair respectively. From the figures, the correlation was lower for the genes (maximum correlation  $0.6$ ) than the proteins (maximum correlation  $0.8$ ). There was no indication that the angular distance improved the strength of correlation between the estimated patterns from gSVD and the true patterns.

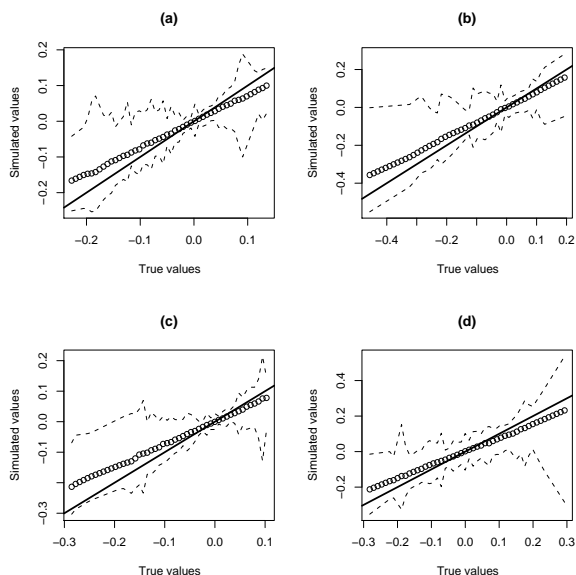

Figure 5: True pattern-pairs versus estimated pattern-pairs from CFA via SVD (250 simulations with  $n = 59$  samples). (a) and (b) are the gene and protein patterns of the first pattern-pair respectively, while (c) and (d) are the gene and protein patterns of the second pattern-pair respectively. The solid line is the line-of-identity, the broken line is the interpolated 5-th and 95-th percentile of the estimated patterns from 250 simulations, while the circles are their interpolated means.

## 6 NCI data results of CFA (Molecular Function)

This section contains the results of CFA on NCI data. The number of GO terms and the corresponding number of enriched GO terms for the genes were 743 and 38 for the first gene patterns, 665 and 37 for the second gene patterns, and 784 and 16 for the third gene patterns. There were altogether 57 enriched GO terms and half of them (25 GO terms) were also interesting in another pattern-pair. Table 1 shows the top 10 most enriched GO terms from the gene patterns for each pattern-pair. There were altogether 23 unique GO terms.

Similar to CFA for biological process, we validated whether the pattern-pairs from CFA for molecular function gave coherent signal. Figure 8 shows GO terms associated with the top 10 proteins were lower than those from the bottom 10 and this difference was insignificant ( $p\text{-value} = 0.454$  using Wilcoxon test). This suggested that the pattern-pairs were discordant but not significant. When we considered the boxplot for each pattern-pair, we saw that the top 10 proteins had consistently higher median rank than the bottom 10, see Figure 9. This was not observed for gSVD.

| GO ID      | GO Term                                                                                                                                                       | Q-value(1)   | Q-value(2)   | Q-value(3) |
|------------|---------------------------------------------------------------------------------------------------------------------------------------------------------------|--------------|--------------|------------|
| GO:0004867 | serine-type endopeptidase inhibitor activity                                                                                                                  | $4.19e - 06$ |              |            |
| GO:0004866 | endopeptidase inhibitor activity                                                                                                                              | $4.19e - 06$ |              |            |
| GO:0030414 | protease inhibitor activity                                                                                                                                   | $4.19e - 06$ |              |            |
| GO:0051015 | actin filament binding                                                                                                                                        | $1.49e - 04$ |              |            |
| GO:0019838 | growth factor binding                                                                                                                                         | $6.38e - 04$ |              |            |
| GO:0048154 | S100 beta binding                                                                                                                                             | $1.05e - 03$ |              |            |
| GO:0005201 | extracellular matrix structural constituent                                                                                                                   |              | $3.88e - 06$ |            |
| GO:0005507 | copper ion binding                                                                                                                                            |              | $8.44e - 06$ |            |
| GO:0030247 | polysaccharide binding                                                                                                                                        |              | $8.44e - 06$ |            |
| GO:0005198 | structural molecule activity                                                                                                                                  |              | $1.17e - 05$ |            |
| GO:0001871 | pattern binding                                                                                                                                               |              | $2.12e - 05$ |            |
| GO:0005539 | glycosaminoglycan binding                                                                                                                                     |              | $2.63e - 05$ |            |
| GO:0016717 | oxidoreductase activity, acting on paired donors, with oxidation of a pair of donors resulting in the reduction of molecular oxygen to two molecules of water |              |              | 0.000258   |
| GO:0042802 | identical protein binding                                                                                                                                     |              |              | 0.014500   |
| GO:0019207 | kinase regulator activity                                                                                                                                     |              |              | 0.014500   |
| GO:0004295 | trypsin activity                                                                                                                                              |              |              | 0.018200   |
| GO:0030234 | enzyme regulator activity                                                                                                                                     |              |              | 0.034300   |
| GO:0017017 | MAP kinase tyrosine/serine/threonine phosphatase activity                                                                                                     |              |              | 0.039700   |
| GO:0005515 | protein binding                                                                                                                                               | $1.77e - 04$ | $3.20e - 06$ |            |
| GO:0004857 | enzyme inhibitor activity                                                                                                                                     | $1.90e - 06$ |              | 0.002900   |
| GO:0005509 | calcium ion binding                                                                                                                                           |              | $1.94e - 06$ | 0.017900   |
| GO:0008092 | cytoskeletal protein binding                                                                                                                                  | $1.25e - 06$ | $1.94e - 06$ | 0.000543   |
| GO:0003779 | actin binding                                                                                                                                                 | $1.25e - 06$ | $1.94e - 06$ | 0.001130   |

Table 1: The first three pattern-pairs from CFA: The top 10 most enriched molecular function GO terms from genes.

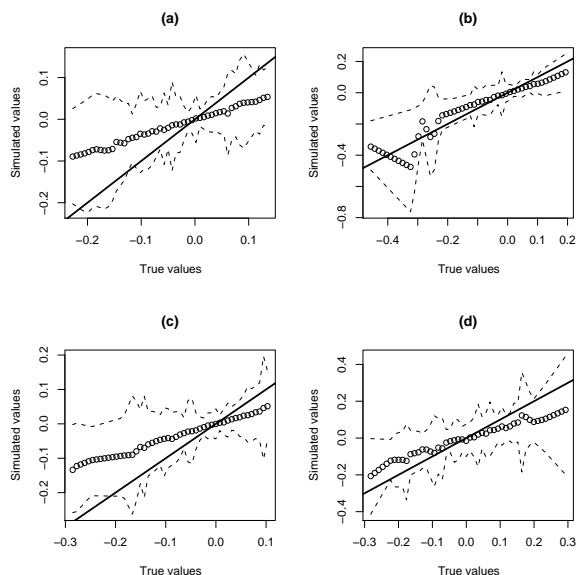

Figure 6: True pattern-pairs versus estimated patterns from gSVD having the highest absolute correlation with the true patterns (250 simulations with  $n = 59$  samples). (a) and (b) are the gene and protein patterns of the first pattern-pair respectively, while (c) and (d) are the gene and protein patterns of the second pattern-pair respectively. The solid line is the line-of-identity, the broken line is the interpolated 5-th and 95-th percentile of the estimated patterns from 250 simulations, while the circles are their interpolated means.

## 7 NCI data results of gSVD (Biological Process)

This section contains the biological process results of gSVD on NCI data. The number of GO terms and the corresponding number of enriched GO terms for the genes were 1928 and 65 for the first gene patterns, 1854 and 3 for the second gene patterns, and 1991 and 71 for the third gene patterns. There were altogether 108 enriched GO terms and about 25% of them (28 GO terms) were also interesting in another pattern-pair. Table 2 shows the top 10 most enriched GO terms from the gene patterns. For the second pattern-pair, it had three enriched GO terms. There were altogether 14 unique GO terms.

We validated whether the pattern-pairs from gSVD for biological process gave coherent signal. Figure 10 shows GO terms associated with the top 10 proteins were lower than those from the bottom 10 and this difference was insignificant (p-value = 0.130 using Wilcoxon test). This suggested that the pattern-pair information could be discordant but insignificant.



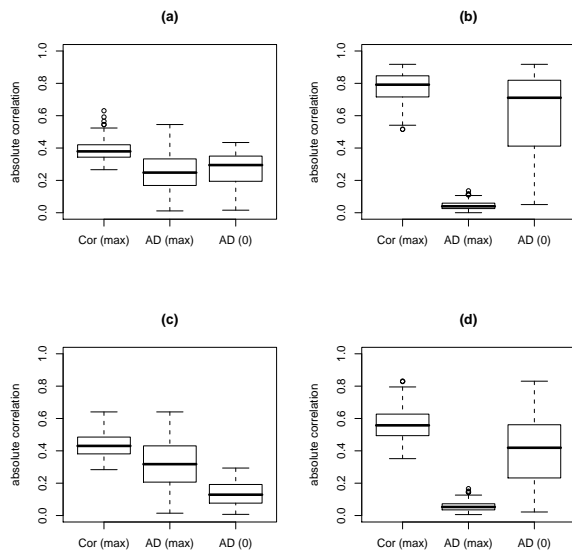

Figure 7: Boxplots of the correlation between the true patterns, and estimated patterns from gSVD. (a) and (b) are the gene and protein patterns of the first pattern-pair respectively, while (c) and (d) are the gene and protein patterns of the second pattern-pair respectively. Cor (max) corresponds to estimated patterns from gSVD having the largest absolute correlation with the true patterns. AD (max) corresponds to the estimated patterns from gSVD having the highest absolute correlation with true patterns among the two pattern-pairs with angular distances nearest to  $\pi/4$ , while AD (0) corresponds to the estimated patterns from gSVD having the highest absolute correlation with true patterns among the two pattern-pairs with angular distances nearest to 0.

| GO ID      | GO Term                                                          | Q-value(1)   | Q-value(2) | Q-value(3)   |
|------------|------------------------------------------------------------------|--------------|------------|--------------|
| GO:0001568 | blood vessel development                                         | $1.42e - 05$ |            |              |
| GO:0007169 | transmembrane receptor protein tyrosine kinase signaling pathway | $1.53e - 05$ |            |              |
| GO:0048514 | blood vessel morphogenesis                                       | $1.53e - 05$ |            |              |
| GO:0001944 | vasculature development                                          | $1.62e - 05$ |            |              |
| GO:0048513 | organ development                                                |              |            | $1.00e - 05$ |
| GO:0009605 | response to external stimulus                                    |              |            | $1.02e - 05$ |
| GO:0009653 | anatomical structure morphogenesis                               |              |            | $3.31e - 04$ |
| GO:0048731 | system development                                               | $1.91e - 07$ |            | $8.23e - 08$ |
| GO:0022610 | biological adhesion                                              |              |            | $5.35e - 06$ |
| GO:0032502 | developmental process                                            | $3.05e - 09$ | 0.0257     | $5.45e - 07$ |
| GO:0048856 | anatomical structure development                                 | $3.05e - 09$ |            | $1.35e - 09$ |
| GO:0007275 | multicellular organismal development                             | $3.79e - 07$ | 0.0436     | $2.41e - 08$ |
| GO:0032501 | multicellular organismal process                                 | $1.03e - 06$ | 0.0257     | $5.48e - 08$ |
| GO:0007155 | cell adhesion                                                    | $3.66e - 05$ |            | $5.35e - 06$ |

Table 2: The first three pattern-pairs from gSVD with the smallest angular distances: The top 10 most enriched biological process GO terms from genes. For the second pattern-pair, it has three enriched GO terms.

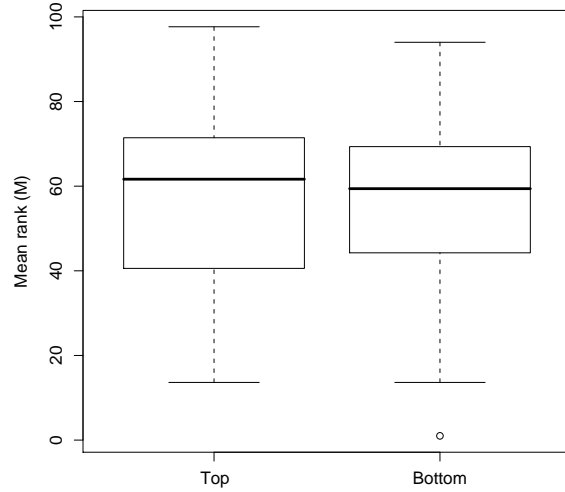

Figure 8: The boxplot of the average rank  $M$  of p-values from the GO analysis of the molecular function for genes that match with the protein's GO terms, which are from the top 10 and bottom 10 proteins. The GO analysis uses the first three pattern-pairs from CFA.

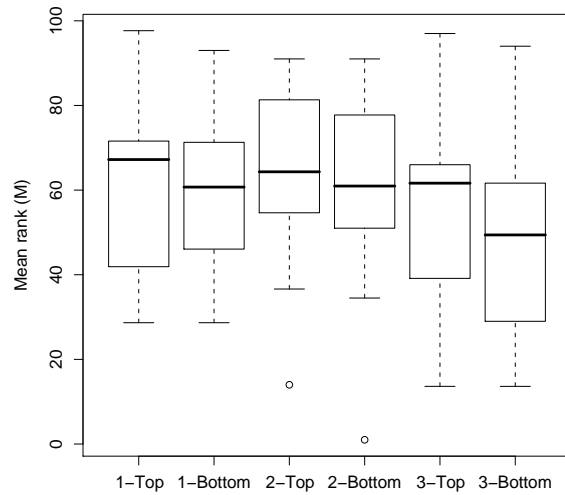

Figure 9: Similar to Figure 8 but we plot the average rank  $M$  of p-values for each pattern-pair.

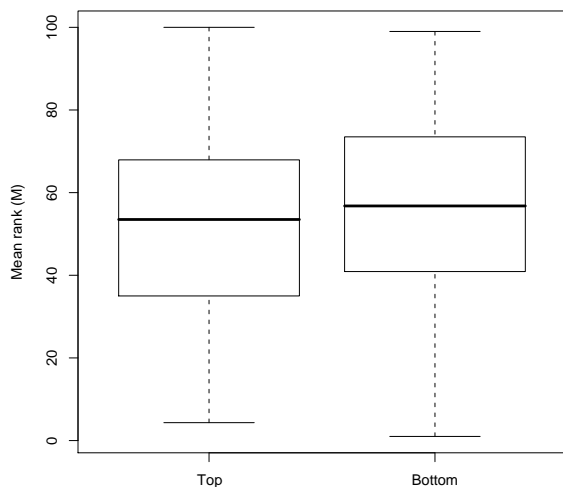

Figure 10: The boxplot of the average rank  $M$  of p-values from the GO analysis of the biological process for genes that match with the protein’s GO terms, which are from the top 10 and bottom 10 proteins. The GO analysis uses the three pattern-pairs from gSVD with the three smallest angular distances.

## 8 NCI data results of gSVD (Molecular Function)

This section contains the molecular function results of gSVD on NCI data. The number of GO terms and the corresponding number of enriched GO terms for the genes were 833 and 17 for the first gene patterns, 768 and 1 for the second gene patterns, and 759 and 10 for the third gene patterns. There were altogether 21 enriched GO terms and about 30% of them (6 GO terms) were also interesting in another pattern-pair. Table 3 shows the top 10 most enriched GO terms from the gene patterns. For the second pattern-pair, it had one enriched GO terms. There were altogether 16 unique GO terms.

We validated whether the pattern-pairs from gSVD for molecular function gave coherent signal. Figure 11 shows GO terms associated with the bottom 10 proteins were similar with the top 10 (p-value =0.815 using Wilcoxon test). This suggested that the pattern-pair information could be discordant but insignificant.

| GO ID      | GO Term                                                                                         | Q-value(1) | Q-value(2) | Q-value(3)   |
|------------|-------------------------------------------------------------------------------------------------|------------|------------|--------------|
| GO:0008083 | growth factor activity                                                                          | 0.0138     |            |              |
| GO:0008307 | structural constituent of muscle                                                                | 0.0273     |            |              |
| GO:0004033 | aldo-keto reductase activity                                                                    | 0.0273     |            |              |
| GO:0047115 | trans-1,2-dihydrobenzene-1,2-diol dehydrogenase activity                                        | 0.0273     |            |              |
| GO:0008201 | heparin binding                                                                                 | 0.0273     |            |              |
| GO:0005125 | cytokine activity                                                                               | 0.0273     |            |              |
| GO:0005102 | receptor binding                                                                                |            |            | $1.56e - 03$ |
| GO:0016620 | oxidoreductase activity, acting on the aldehyde or oxo group of donors, NAD or NADP as acceptor |            |            | $3.53e - 03$ |
| GO:0005520 | insulin-like growth factor binding                                                              |            |            | $1.04e - 02$ |
| GO:0004030 | aldehyde dehydrogenase [NAD(P)+] activity                                                       |            |            | $2.28e - 02$ |
| GO:0016903 | oxidoreductase activity, acting on the aldehyde or oxo group of donors                          |            |            | $2.40e - 02$ |
| GO:0004857 | enzyme inhibitor activity                                                                       | 0.0138     |            | $1.46e - 06$ |
| GO:0004866 | endopeptidase inhibitor activity                                                                | 0.0273     |            | $4.08e - 07$ |
| GO:0030414 | protease inhibitor activity                                                                     | 0.0273     |            | $4.08e - 07$ |
| GO:0004867 | serine-type endopeptidase inhibitor activity                                                    | 0.0273     |            | $1.71e - 05$ |
| GO:0005201 | extracellular matrix structural constituent                                                     |            | 0.0138     | $1.04e - 02$ |

Table 3: The first three pattern-pairs from gSVD with the smallest angular distances: The top 10 most enriched molecular function GO terms from genes. For the second pattern-pair, it has one enriched GO terms.

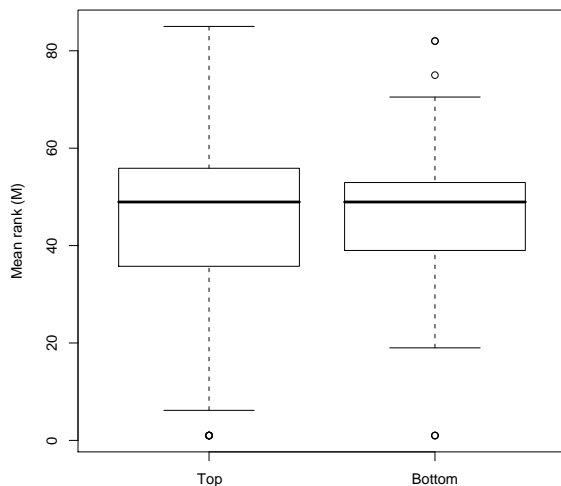

Figure 11: The boxplot of the average rank  $M$  of p-values from the GO analysis of the molecular function for genes that match with the protein's GO terms, which are from the top 10 and bottom 10 proteins. The GO analysis uses the three pattern-pairs from gSVD with the three smallest angular distances.

## 9 Compare CFA and gSVD on NCI data (Biological Process)

This section contains the results of comparing CFA and gSVD on NCI data, where the three pattern-pairs from gSVD had the highest correlation with the first three pattern-pairs from CFA. The number of GO terms and the corresponding number of enriched GO terms for the genes were 1975 and 96 for the first gene patterns, 1854 and 46 for the second gene patterns, and 2091 and 110 for the third gene patterns. There were altogether 172 enriched GO terms and about 30% of them (54 GO terms) were also interesting in another pattern-pair. Table 4 shows the top 10 most enriched GO terms from gene patterns. There were altogether 19 unique GO terms.

| GO ID      | GO Term                                                                                   | Q-value(1)   | Q-value(2)   | Q-value(3)   |
|------------|-------------------------------------------------------------------------------------------|--------------|--------------|--------------|
| GO:0002504 | antigen processing and presentation of peptide or polysaccharide antigen via MHC class II | $2.58e - 05$ |              |              |
| GO:0050896 | response to stimulus                                                                      | $2.89e - 05$ |              |              |
| GO:0030154 | cell differentiation                                                                      | $2.49e - 04$ |              |              |
| GO:0048869 | cellular developmental process                                                            | $2.49e - 04$ |              |              |
| GO:0022610 | biological adhesion                                                                       | $3.99e - 04$ |              |              |
| GO:0001568 | blood vessel development                                                                  |              | $4.36e - 07$ |              |
| GO:0001944 | vasculature development                                                                   |              | $6.99e - 07$ |              |
| GO:0048514 | blood vessel morphogenesis                                                                |              | $1.69e - 06$ |              |
| GO:0009888 | tissue development                                                                        |              |              | $4.03e - 06$ |
| GO:0051046 | regulation of secretion                                                                   |              |              | $9.72e - 05$ |
| GO:0042060 | wound healing                                                                             |              |              | $2.68e - 04$ |
| GO:0065008 | regulation of biological quality                                                          |              |              | $2.68e - 04$ |
| GO:0007155 | cell adhesion                                                                             | $3.99e - 04$ | $1.69e - 06$ |              |
| GO:0048513 | organ development                                                                         |              | $1.08e - 07$ | $2.68e - 04$ |
| GO:0007275 | multicellular organismal development                                                      |              | $1.57e - 07$ | $1.14e - 04$ |
| GO:0032501 | multicellular organismal process                                                          | $7.37e - 06$ | $7.06e - 10$ | $2.94e - 07$ |
| GO:0032502 | developmental process                                                                     | $1.68e - 05$ | $1.64e - 09$ | $9.72e - 05$ |
| GO:0048856 | anatomical structure development                                                          | $2.89e - 05$ | $1.64e - 09$ | $1.65e - 05$ |
| GO:0048731 | system development                                                                        | $2.49e - 04$ | $2.52e - 08$ | $1.09e - 04$ |

Table 4: The three pattern-pairs from gSVD having the highest absolute correlation with the first three pattern-pairs from CFA: The top 10 most enriched biological process GO terms from genes.

We validated whether the pattern-pairs from gSVD for biological process gave coherent signal. Figure 12 shows GO terms associated with the top 10 proteins were higher than those from the bottom 10 and this difference was significant (p-value = 0.019 using Wilcoxon test).

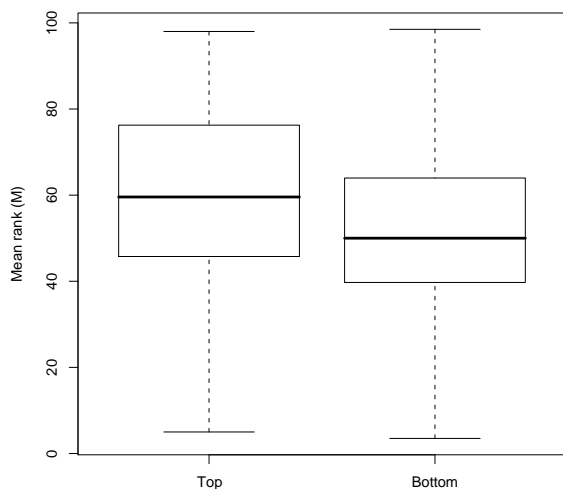

Figure 12: The boxplot of the average rank  $M$  of p-values from the GO analysis of the biological process for genes that match with the protein's GO terms, which are from the top 10 and bottom 10 proteins. The GO analysis uses the three pattern-pairs from gSVD which have the highest absolute correlation with the first three pattern-pairs from CFA.

## 10 Compare CFA and gSVD on NCI data (Molecular Function)

The number of GO terms and the corresponding number of enriched GO terms for the genes were 732 and 3 for the first gene patterns, 803 and 15 for the second gene patterns, and 799 and 9 for the third gene patterns. There were altogether 21 enriched GO terms and about 10% of them (2 GO terms) were also interesting in another pattern-pair. Table 5 shows the top 10 most enriched GO terms from gene patterns. For the first and third pattern-pairs, they had three and nine enriched GO terms respectively. There were altogether 21 unique GO terms.

We validated whether the pattern-pairs from gSVD for molecular function gave coherent signal. Figure 13 shows GO terms associated with the top 10 proteins were similar with the bottom 10 (p-value = 0.891 using Wilcoxon test).

Figure 14 suggests that only CFA had consistent concordance between the gene and protein GO terms in all three pattern-pairs.

| GO ID      | GO Term                                                | Q-value(1)   | Q-value(2) | Q-value(3) |
|------------|--------------------------------------------------------|--------------|------------|------------|
| GO:0032395 | MHC class II receptor activity                         | $4.94e - 05$ |            |            |
| GO:0043548 | phosphoinositide 3-kinase binding                      | $8.23e - 03$ |            |            |
| GO:0005520 | insulin-like growth factor binding                     | $2.86e - 02$ |            |            |
| GO:0004857 | enzyme inhibitor activity                              |              | 0.000831   |            |
| GO:0004860 | protein kinase inhibitor activity                      |              | 0.015500   |            |
| GO:0005507 | copper ion binding                                     |              | 0.015500   |            |
| GO:0019210 | kinase inhibitor activity                              |              | 0.015500   |            |
| GO:0003779 | actin binding                                          |              | 0.015500   |            |
| GO:0019207 | kinase regulator activity                              |              | 0.015500   |            |
| GO:0046870 | cadmium ion binding                                    |              | 0.015500   |            |
| GO:0005515 | protein binding                                        |              | 0.015500   |            |
| GO:0008201 | heparin binding                                        |              | 0.015500   |            |
| GO:0005509 | calcium ion binding                                    |              |            | 0.00328    |
| GO:0004653 | polypeptide N-acetylgalactosaminyltransferase activity |              |            | 0.03490    |
| GO:0030296 | protein tyrosine kinase activator activity             |              |            | 0.03490    |
| GO:0005201 | extracellular matrix structural constituent            |              |            | 0.03680    |
| GO:0005200 | structural constituent of cytoskeleton                 |              |            | 0.03710    |
| GO:0008376 | acetylgalactosaminyltransferase activity               |              |            | 0.03990    |
| GO:0008083 | growth factor activity                                 |              |            | 0.03490    |
| GO:0005198 | structural molecule activity                           |              |            | 0.03710    |
| GO:0005102 | receptor binding                                       |              | 0.001050   | 0.03490    |

Table 5: The three pattern-pairs from gSVD having the highest absolute correlation with the first three pattern-pairs from CFA: The top 10 most enriched molecular function GO terms from genes. For the first and third pattern-pairs, they have three and nine enriched GO terms respectively.

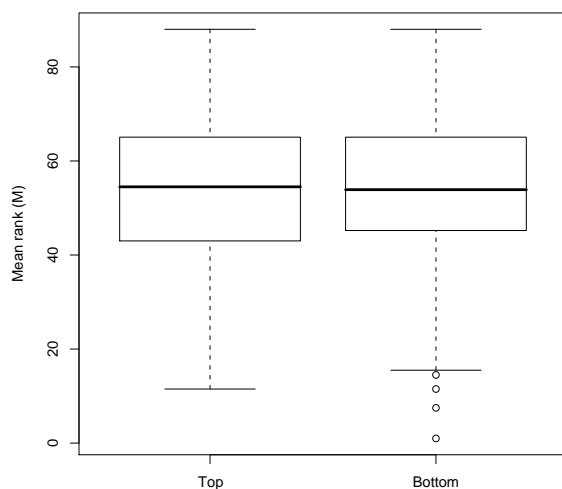

Figure 13: The boxplot of the average rank  $M$  of p-values from the GO analysis of the molecular function for genes that match with the protein's GO terms, which are from the top 10 and bottom 10 proteins. The GO analysis uses the three pattern-pairs from gSVD which have the highest correlation with the first three pattern-pairs from CFA.

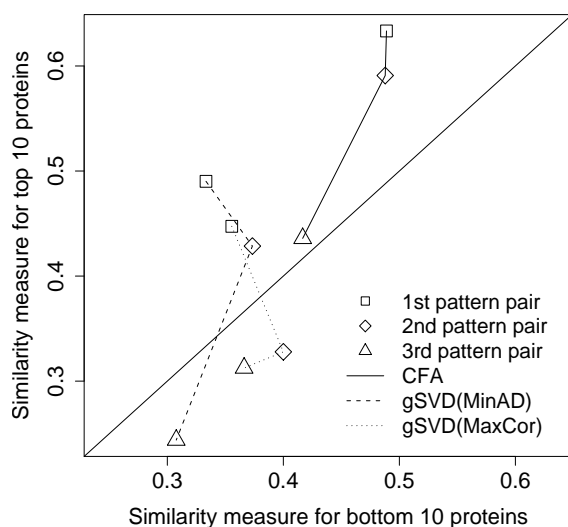

Figure 14: The proportion of nodes from the gene's induced graph overlapping with the nodes from the protein's induced graph (similarity measure) for the top and bottom 10 proteins of CFA and gSVD. The diagonal line is where the values from the x-axis and y-axis are equal. gSVD(MinAD): gSVD with the smallest angular distances, gSVD(MaxCor): gSVD having the highest correlation with the first three pattern-pairs from CFA. These are results based on the GO analysis of the molecular function.
